# Supplementary material for: Defect‐Induced Dense Amorphous/Crystalline Heterophase Enables High‐Rate and Ultrastable Sodium Storage
Source: PubMed Central journal article supplement (PMC9798978; doi:10.1002/advs.202205575), 2022-10-30
Supplement: ADVS-9-2205575-s001.pdf [file ADVS-9-2205575-s001.pdf]

# Supporting Information

## **Defect-Induced Dense Amorphous/Crystalline Heterophase Enables High-Rate and Ultra-Stable Sodium Storage**

Sahar Osman, Chao Peng\*, Fangkun Li, Haoliang Chen, Jiadong Shen, Zeming Zhong, Wenjie Huang, Dongfeng Xue, and Jun Liu\*

S. Osman, F. Li, H. Chen, J. Shen, Z. Zhong, W. Huang, Prof. J. Liu

School of Materials Science and Engineering and Guangdong Provincial

Key Laboratory of Advanced Energy Storage Materials

South China University of Technology

Guangzhou, Guangdong 510641, China

Email: msjliu@scut.edu.cn

Dr. C. Peng, Prof. D. Xue

Multiscale Crystal Materials Research Center

Shenzhen Institute of Advanced Technology

Chinese Academy of Science, Shenzhen 518055, China

Email: chao.peng@siat.ac.cn

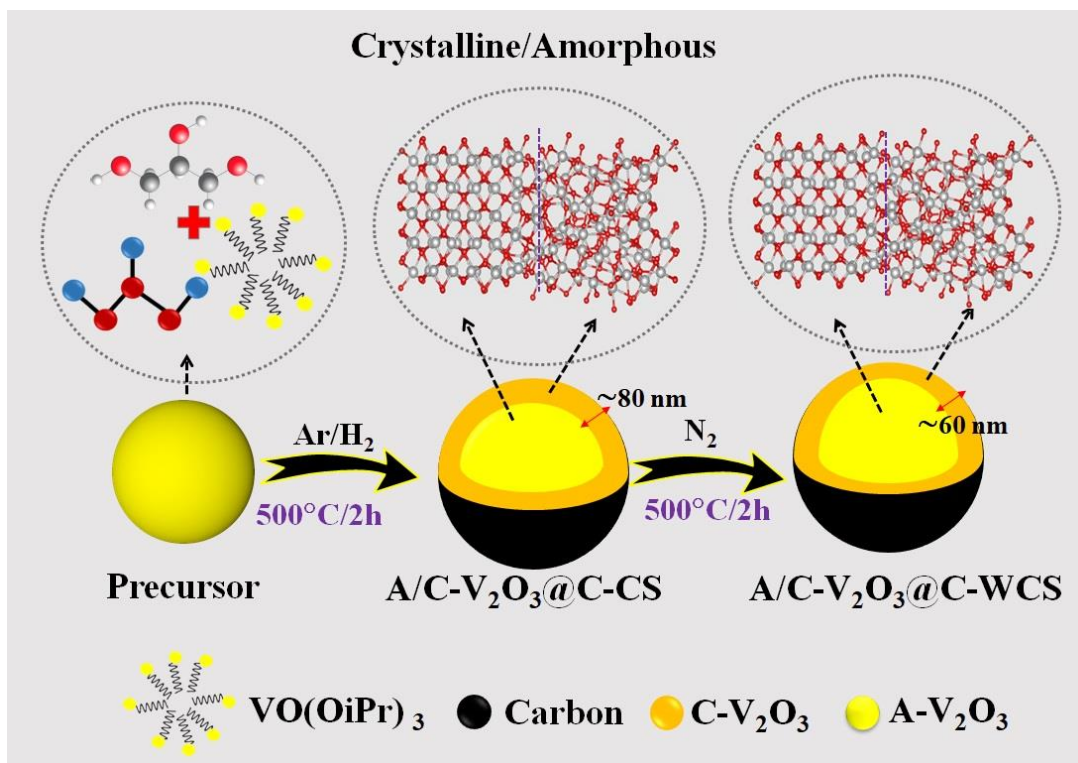

**Figure S1.** Schematic illustration of the synthesis of A/C-V<sub>2</sub>O<sub>3</sub>@C-CS and A/C-V<sub>2</sub>O<sub>3</sub>@C-WCS.

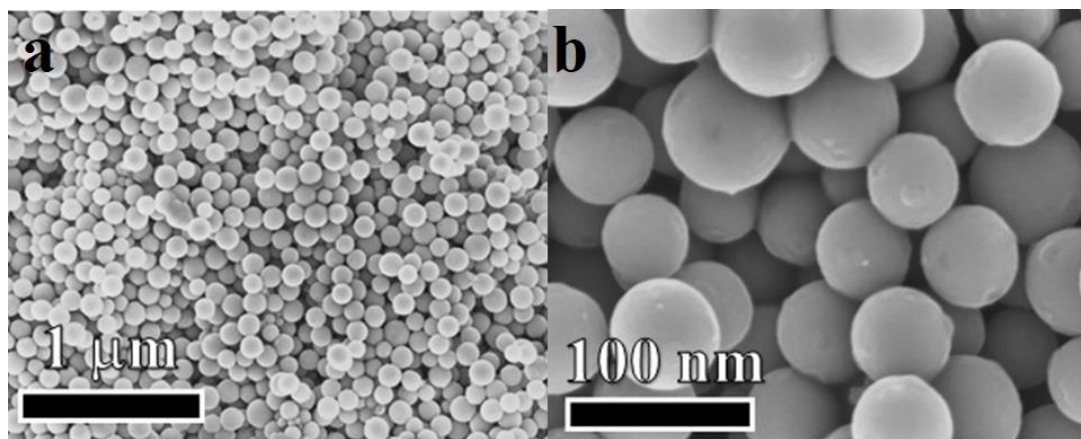

**Figure S2.** (a, b) Low/high magnification SEM images of vanadium-glycerate precursor.

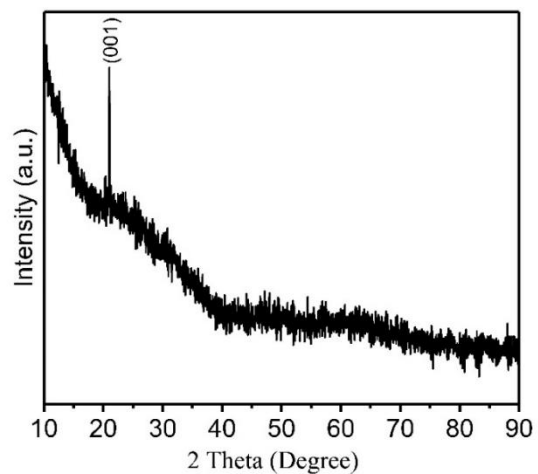

**Figure S3.** XRD pattern of V-glycerate spheres.

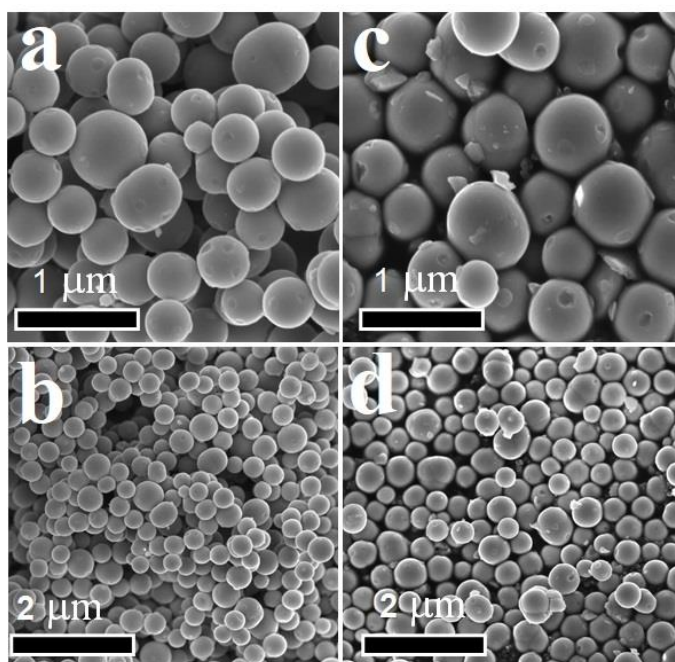

**Figure S4.** High/low-magnification SEM images of (a, b) A/C-V<sub>2</sub>O<sub>3</sub>@C-CS and (c, d) A/C-V<sub>2</sub>O<sub>3</sub>@C-WCS.

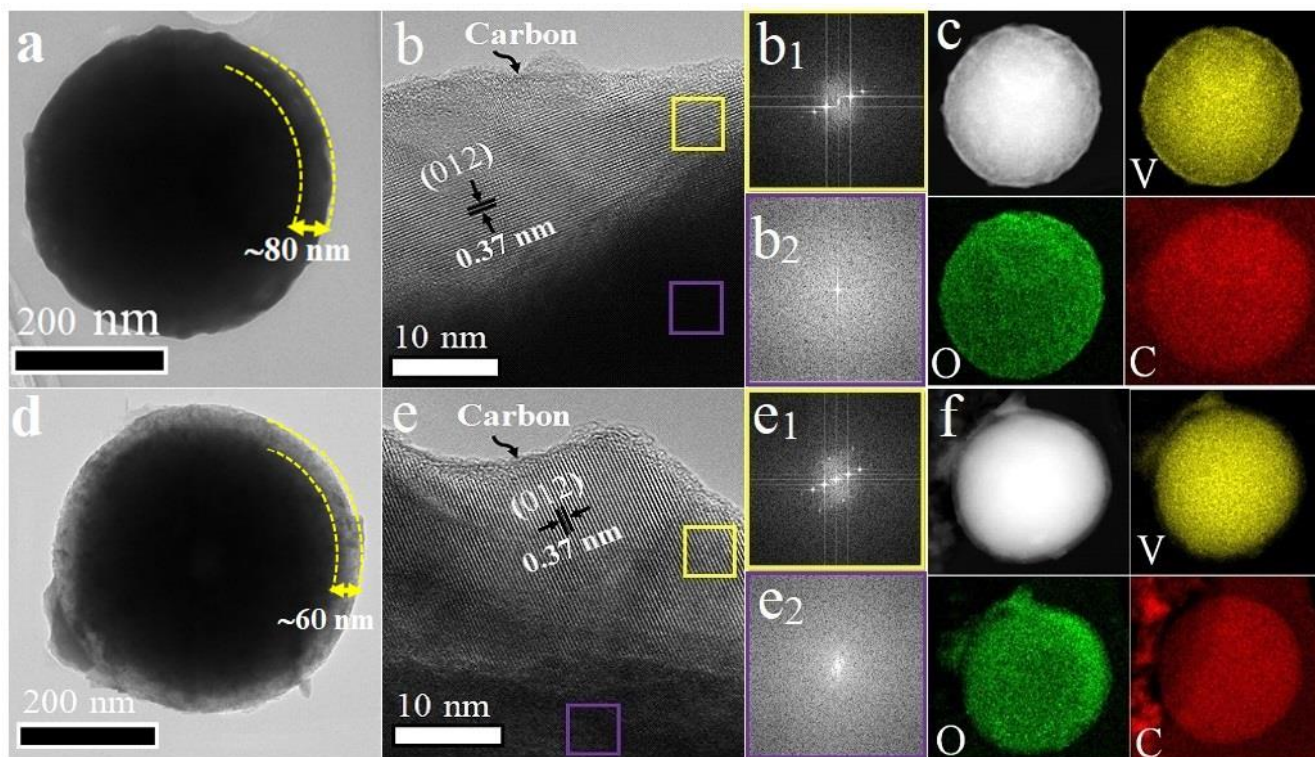

**Figure S5. Morphology and characterizations of A/C-V<sub>2</sub>O<sub>3</sub>@C-CS and /C-V<sub>2</sub>O<sub>3</sub>@C-WCS**  
 (a, d) TEM, (b, e) HRTEM images. (b<sub>1</sub>, e<sub>1</sub>) FFT patterns are taken from the corresponding yellow square and (b<sub>2</sub>, e<sub>2</sub>) violet square areas in (b, e), and (c, f) EDS mapping images of core-shell A/C-V<sub>2</sub>O<sub>3</sub>@C-CS and A/C-V<sub>2</sub>O<sub>3</sub>@C-WCS, respectively.



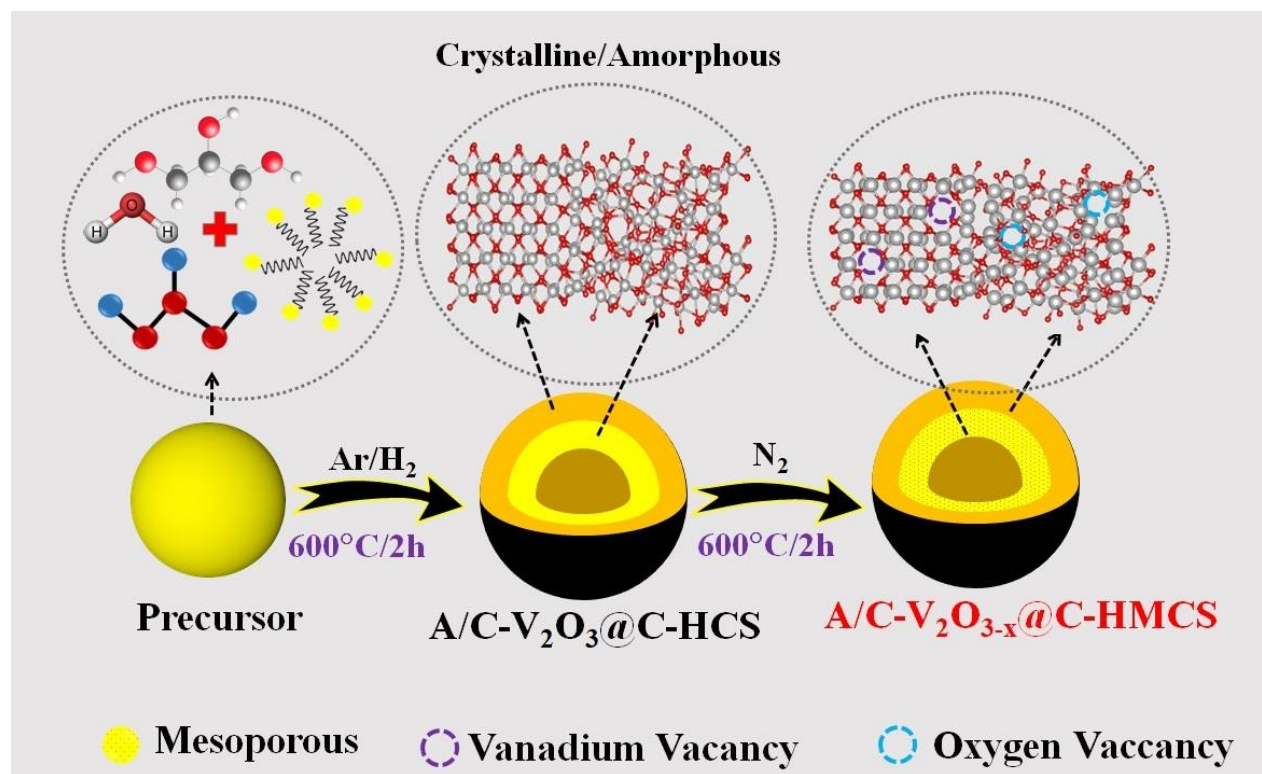

**Figure S6.** Schematic illustration of the synthesis of A/C-V<sub>2</sub>O<sub>3</sub>@C-HCS and A/C-V<sub>2</sub>O<sub>3-x</sub>@C-HMCS.

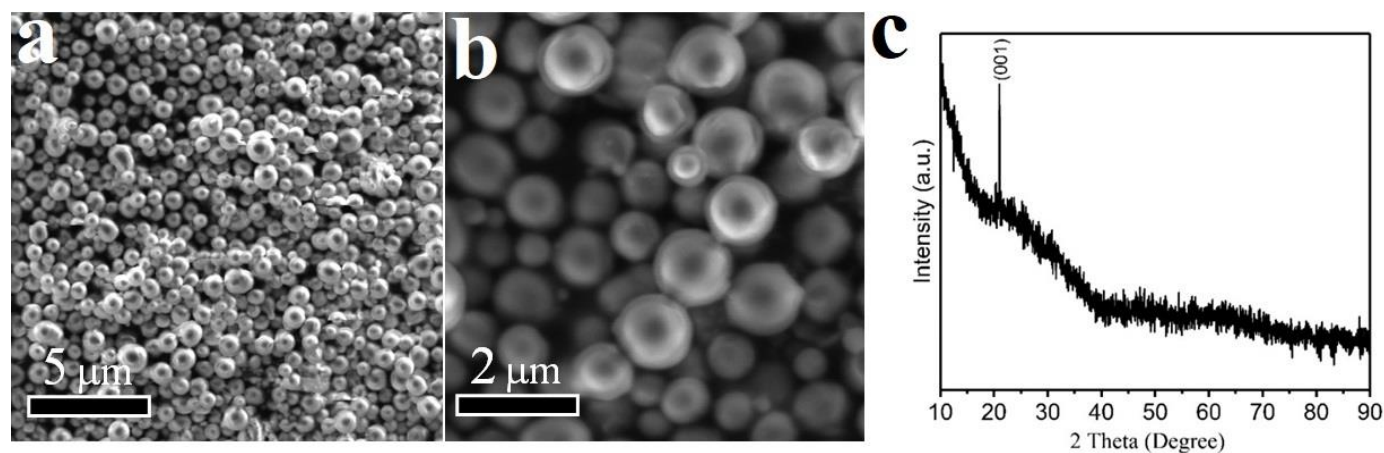

**Figure S7.** (a, b) Low/high magnification SEM images of vanadium hydrate-glycerate precursor. (c) its XRD pattern.

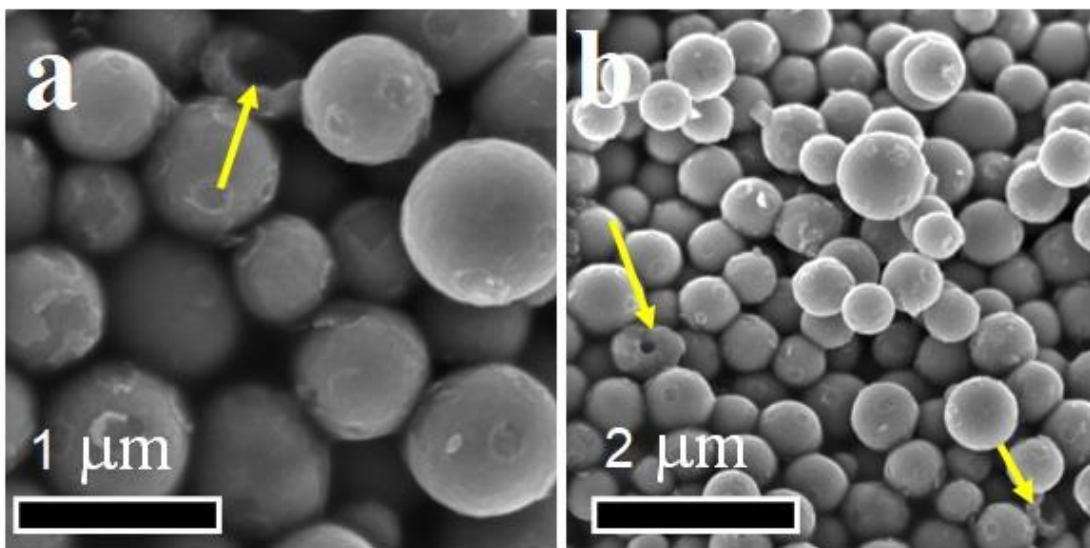

**Figure S8.** (a, b) High/low-magnification SEM images of A/C-V<sub>2</sub>O<sub>3</sub>@C-HCS.

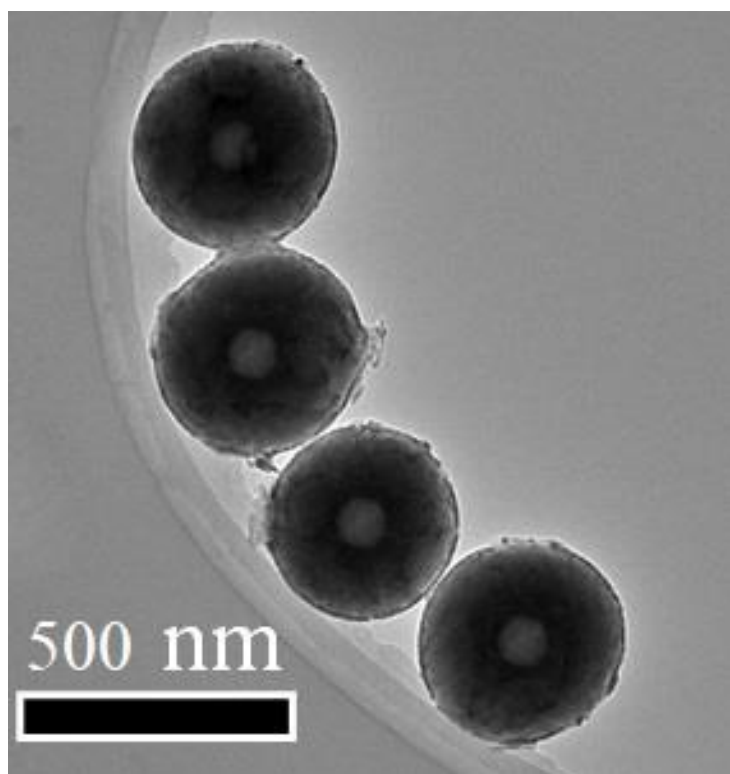

**Figure S9.** TEM image of A/C-V<sub>2</sub>O<sub>3</sub>@C-HCS.

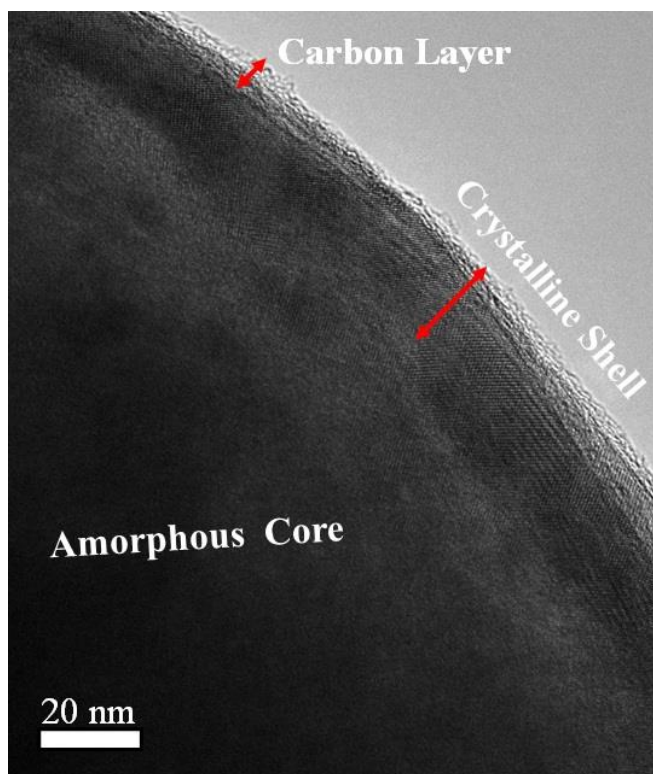

**Figure S10.** HTEM image of A/C-V<sub>2</sub>O<sub>3</sub>@C-HCS.

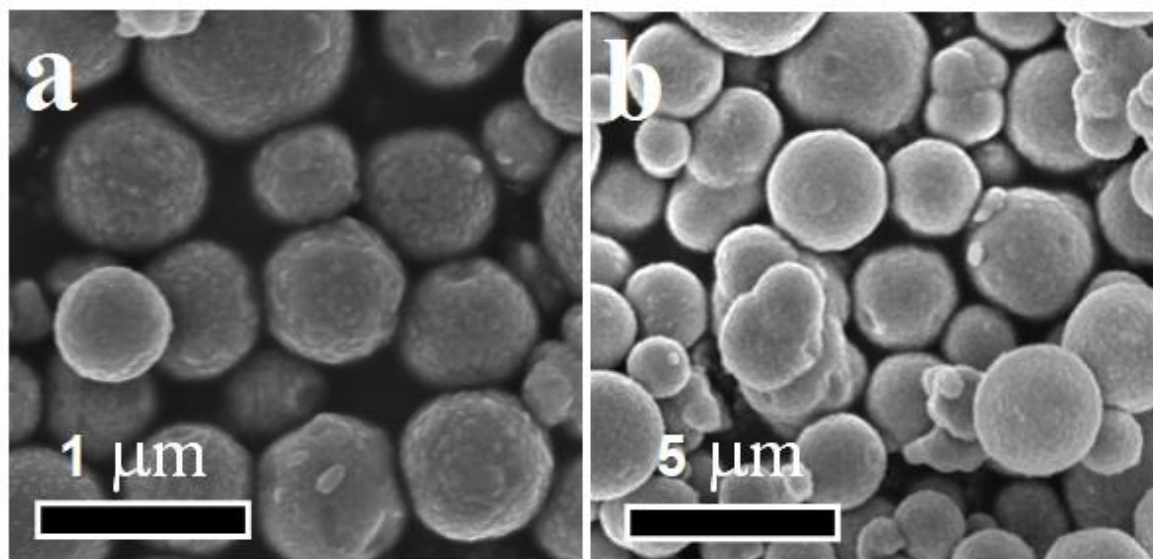

**Figure S11.** (a, b) High/low-magnification SEM images of A/C-V<sub>2</sub>O<sub>3-x</sub>@C-HMCS.

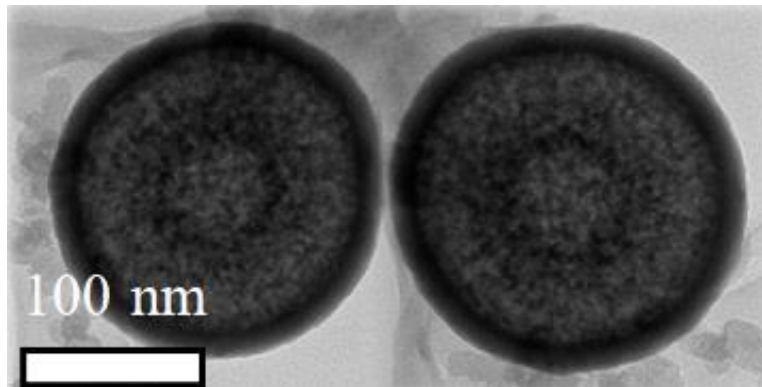

**Figure S12.** TEM image of A/C-V<sub>2</sub>O<sub>3-x</sub>@C-HMCS.

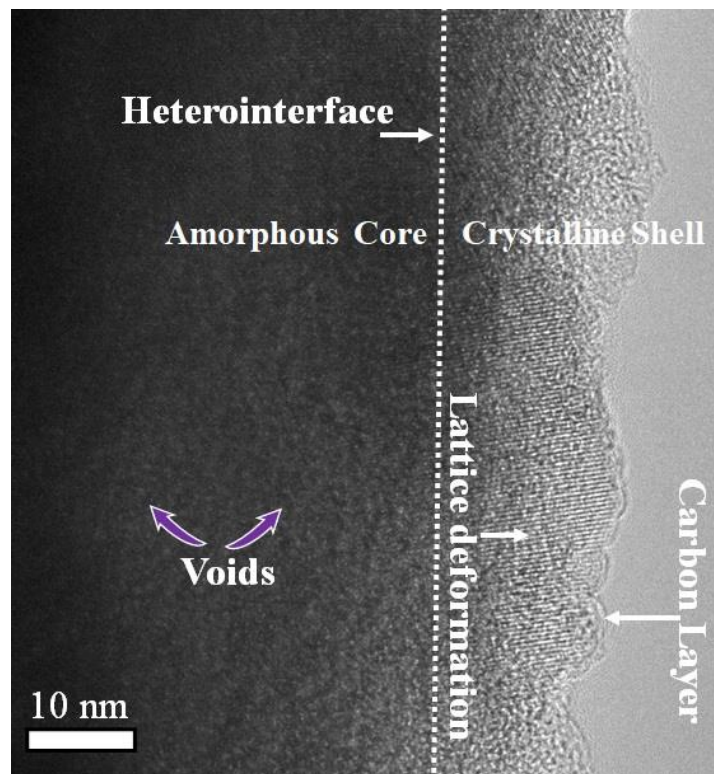

**Figure S13.** HRTEM image of A/C-V<sub>2</sub>O<sub>3-x</sub>@C-HMCS.



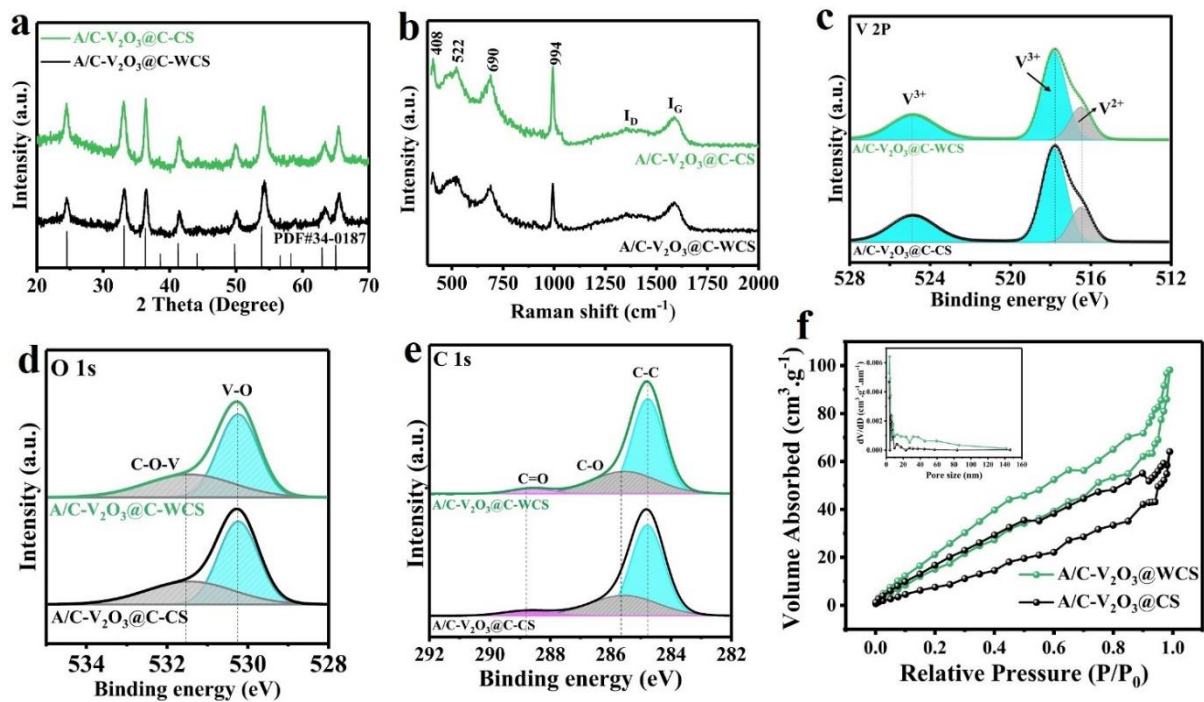

**Figure S14. Structural characterizations of A/C-V<sub>2</sub>O<sub>3</sub>@C-CS and A/C-V<sub>2</sub>O<sub>3</sub>@C-WCS:** (a) XRD patterns, (b) Raman spectra, high-resolution spectra of (c) V 2p, (d) O 1s, (e) C 1s. (f) N<sub>2</sub> adsorption-desorption isotherms and their pore size distributions (inset).

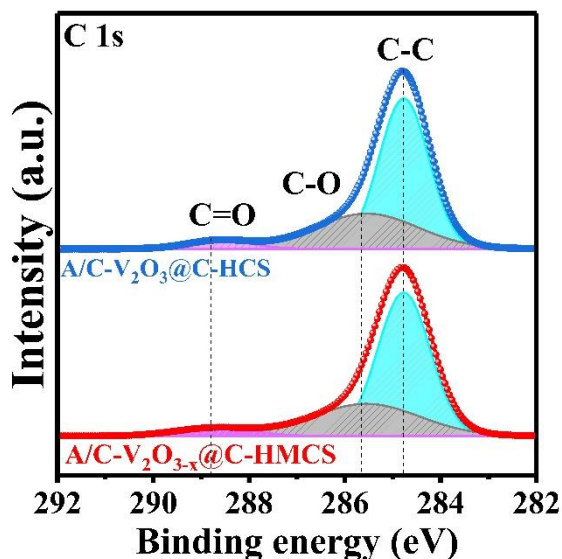

**Figure S15. C 1s high-resolution spectra of A/C-V<sub>2</sub>O<sub>3</sub>@C-HCS and A/C-V<sub>2</sub>O<sub>3-x</sub>@C-HMCS.**

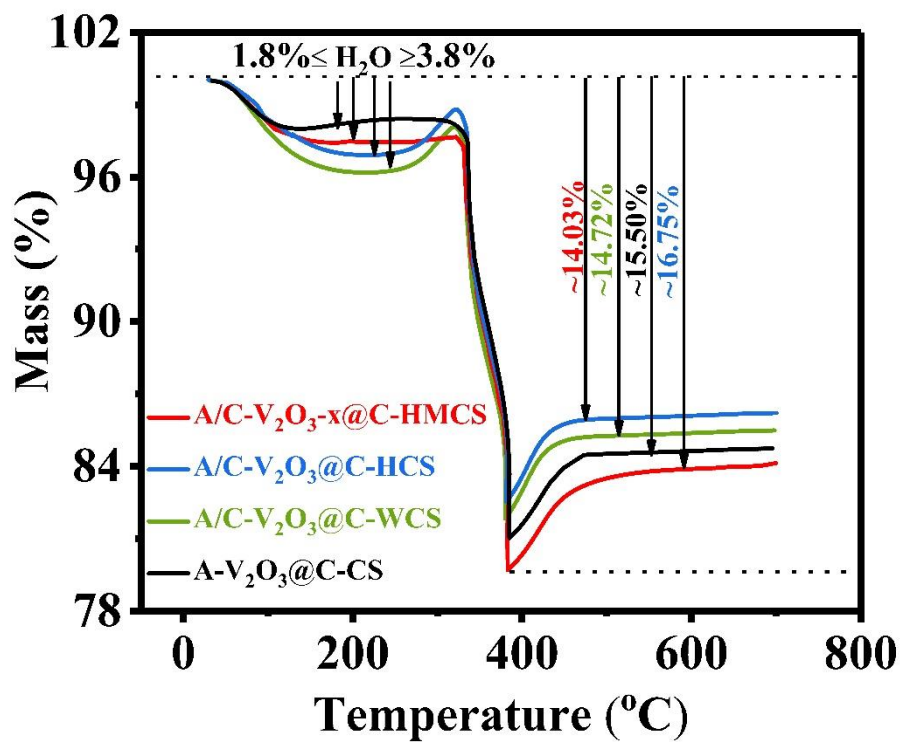

**Figure S16.** Thermogravimetric analysis (TGA) curve for the A/C-V<sub>2</sub>O<sub>3</sub>@C-CS, A/C-V<sub>2</sub>O<sub>3</sub>@C-WCS, A/C-V<sub>2</sub>O<sub>3</sub>@C-HCS, and A/C-V<sub>2</sub>O<sub>3-x</sub>@C-HMCS.

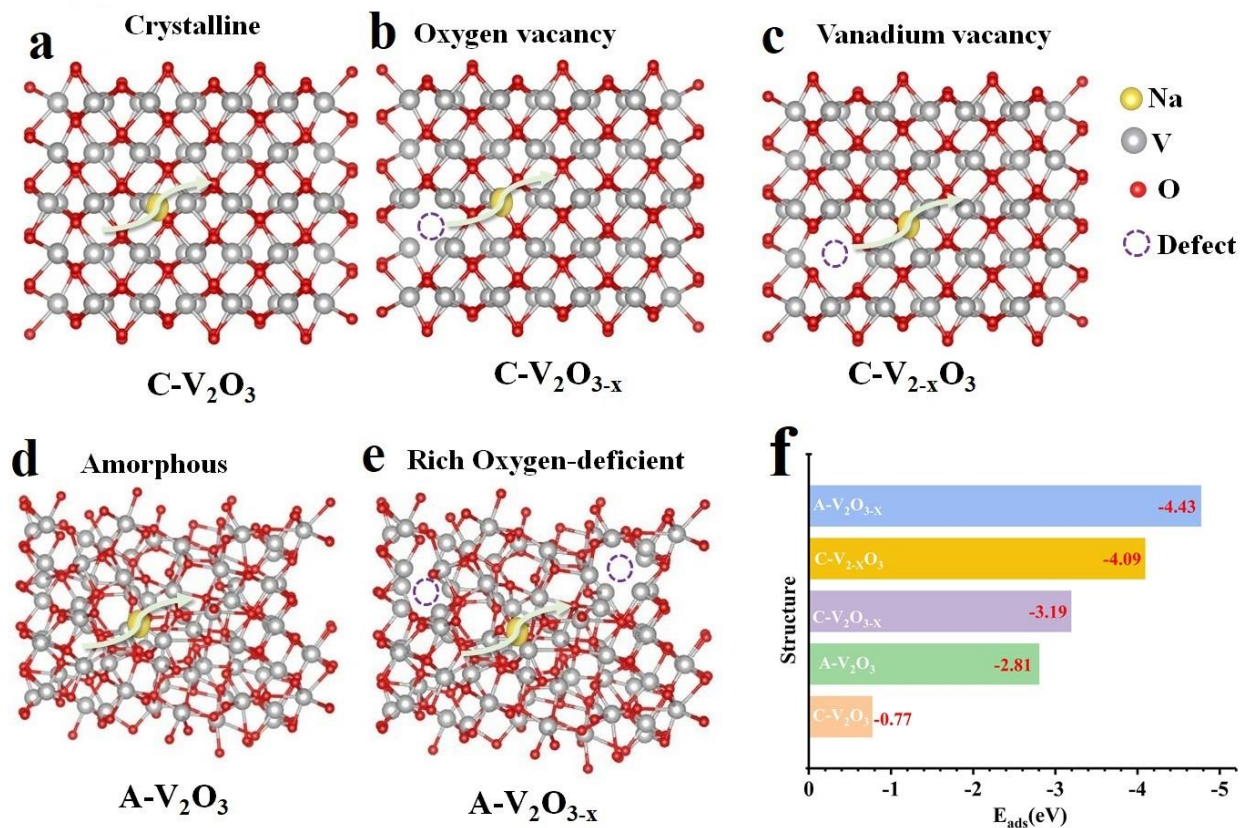

**Figure S17.** Structure models of Na diffusion in (a) C-V<sub>2</sub>O<sub>3</sub>, (b) C-V<sub>2</sub>O<sub>3-x</sub>, (c) C-V<sub>2-x</sub>O<sub>3</sub>, (d) A-V<sub>2</sub>O<sub>3</sub>, (e) A-V<sub>2</sub>O<sub>3-x</sub>, and (f) their corresponding Na adsorption energies).

**Supplemental Table**  
in various V<sub>2</sub>O<sub>3</sub>

| Structure                                   | E <sub>ads</sub> (eV) |
|---------------------------------------------|-----------------------|
| C-V <sub>2</sub> O <sub>3</sub>             | -0.77                 |
| A-V <sub>2</sub> O <sub>3</sub>             | -2.81                 |
| C-V <sub>2</sub> O <sub>3-x</sub>           | -3.19                 |
| C-V <sub>2-x</sub> O <sub>3</sub>           | -4.09                 |
| A-V <sub>2</sub> O <sub>3-x</sub>           | -4.43                 |
| A/C-V <sub>2</sub> O <sub>3</sub> @C-HMCS   | -1.77                 |
| A/C-V <sub>2</sub> O <sub>3-x</sub> @C-HMCS | -4.77                 |

**S1: Adsorption energy of Na structures.**

## Theoretical discussion of Na in various $V_2O_3$ structures

The adsorption energy ( $E_{\text{ads}}$ ) of the Na atom at amorphous structure is calculated to be -2.81 eV which is much lower than that of crystalline structure (-0.77 eV), indicating that porous isotropic amorphous phase is favorable for Na intercalation (Figure S17a,d). In addition, the  $E_{\text{ads}}$  of C- $V_2O_{3-x}$  is even lower -3.19 eV (Figure S17b), which should be ascribed to oxygen vacancies, suggesting that the O-defective is highly beneficial for Na insertion. Distinctly, vanadium-deficient crystalline structure C- $V_{2-x}O_3$  displays lower  $E_{\text{ads}}$  -4.09 eV than crystalline, amorphous, and O-deficient crystalline structure, resulting in higher adsorbing ability and faster kinetics of Na storage (Figure S17c). This enhancement is attributed to a higher coordination number and radius of the vanadium atom compared to the oxygen atom, which leads to enlarged  $Na^+$  diffusion channels in the crystalline phase, thereby optimizing its kinetics. Further by combining the porous amorphous structure and oxygen-deficient, the A- $V_2O_{3-x}$  possesses a much lower  $Na^+$  adsorption energy of -4.43 eV compared to all single structures counterparts (Figure S17e), suggesting A- $V_2O_{3-x}$  is the most energetically favorable for Na insertion. This result suggests that tailoring unsaturated coordination sites is an effective strategy to enhance the adsorption of  $Na^+$  (Figure S17f, Table S1).



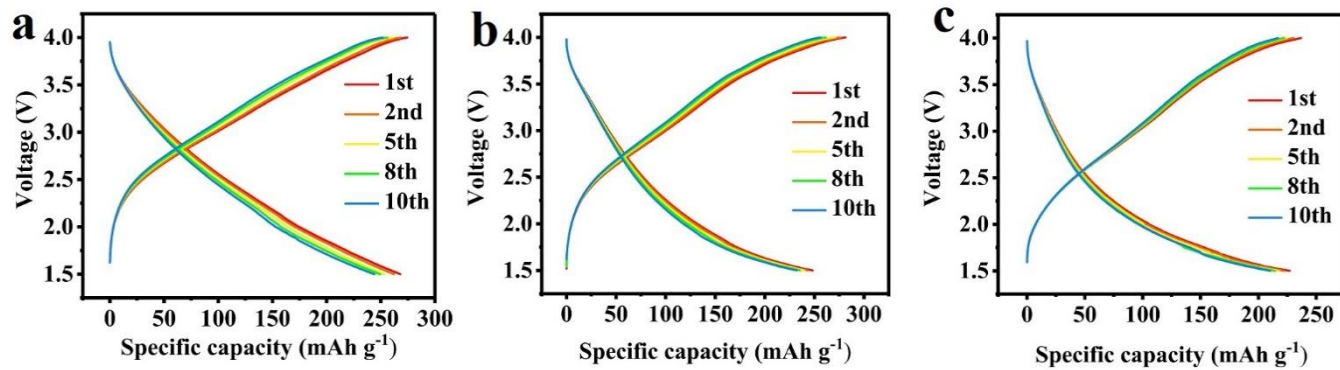

**Figure S18.** Discharge/charge profiles of (a) A/C-V<sub>2</sub>O<sub>3</sub>@C-HCS, (b) A/C-V<sub>2</sub>O<sub>3</sub>@C-WCS, and (c) A/C-V<sub>2</sub>O<sub>3</sub>@C-CS electrodes at 0.1 A g<sup>-1</sup>.

**Supplemental Table 2:** Comparison of the electrochemical performance with reported A/C-V<sub>2</sub>O<sub>3</sub>@C-M based electrodes.

| <b>Cathode description</b>                                                                      | <b>Capacity Retention (% , cycles No)</b> | <b>Rate performance (mAh g<sup>-1</sup>)/ (A g<sup>-1</sup>)</b> | <b>Average voltage (V)</b> | <b>Ref</b> |
|-------------------------------------------------------------------------------------------------|-------------------------------------------|------------------------------------------------------------------|----------------------------|------------|
| A/C-V <sub>2</sub> O <sub>3</sub> @C-CS core-shell                                              | 93%,6000                                  | 92/10                                                            | 2.6                        | This work  |
| A/C-V <sub>2</sub> O <sub>3</sub> @C-WCS core-shell                                             | 100%,6000                                 | 123/10                                                           | 2.7                        |            |
| A/C-V <sub>2</sub> O <sub>3</sub> @C-HCS core-shell                                             | 100%,6000                                 | 155/10                                                           | 2.8                        |            |
| A/C-V <sub>2</sub> O <sub>3-x</sub> @C-HMCS core-shell                                          | 100%,6000                                 | 192/10                                                           | 2.8                        |            |
| NaV <sub>6</sub> O <sub>15</sub> /MWCNTs nanotube                                               | 96%,500                                   | 123.7/10                                                         | 2.7                        | [1]        |
| A-V <sub>2</sub> O <sub>5</sub> /C-WCS core-shell                                               | 95%,3000                                  | 148/5.0                                                          | 3.0                        | [2]        |
| Bilayered V <sub>2</sub> O <sub>5</sub>                                                         | 85%,320                                   | 150/0.63                                                         | 3.0                        | [3]        |
| Additive-free V <sub>2</sub> O <sub>5</sub> thin film                                           | 100%,200                                  | 124/5.0                                                          | -0.25                      | [4]        |
| Co <sub>0.16</sub> Zn <sub>0.09</sub> V <sub>2</sub> O <sub>5</sub> ·nH <sub>2</sub> O          | 97%,1000                                  | 90/3.0                                                           | 0.7                        | [5]        |
| cG/VO microspheres                                                                              | 73%,2000                                  | 214/4.0                                                          | 1.0                        | [6]        |
| VS <sub>4</sub> Nanoparticles                                                                   | 84%,1200                                  | 188.1/4.0                                                        | 1.2                        | [7]        |
| NaV <sub>6</sub> O <sub>15</sub> nanotube                                                       | 94%,3000                                  | 105/2.5                                                          | 2.5                        | [8]        |
| NaVOPO <sub>4</sub> layered                                                                     | 67%, 1000                                 | 57/0.73                                                          | 3.3                        | [9]        |
| Na <sub>0.282</sub> V <sub>2</sub> O <sub>5</sub> nanorods                                      | 99%,1000                                  | 80/0.3                                                           | 2.7                        | [10]       |
| Na <sub>1.25</sub> V <sub>3</sub> O <sub>8</sub> nanowires                                      | 87%,1000                                  | 76/2.0                                                           | 2.4                        | [11]       |
| Na <sub>3</sub> V <sub>2</sub> (PO <sub>4</sub> ) <sub>3</sub> spheres                          | 87.5%,1000                                | 96/2.0                                                           | 3.35                       | [12]       |
| Na <sub>3</sub> V <sub>2</sub> (PO <sub>4</sub> ) <sub>2</sub> O <sub>2</sub> F nanotetraprisms | 81%,2000                                  | 84/5.2                                                           | 3.8                        | [13]       |
| Na <sub>3</sub> V <sub>2</sub> (PO <sub>4</sub> ) <sub>2</sub> O <sub>2</sub> F carbon cloth    | 95%,1500                                  | 84/1.2                                                           | 3.8                        | [14]       |
| Na <sub>3</sub> V <sub>2</sub> (PO <sub>4</sub> ) <sub>2</sub> F <sub>3</sub> microcubes        | 98%,2000                                  | 53/2.2                                                           | 3.6                        | [15]       |
| Na <sub>6</sub> Fe <sub>5</sub> (SO <sub>4</sub> ) <sub>8</sub> /CNTs nano-architected          | 100.8%,1000                               | 86.4/ 0.24                                                       | 3.6                        | [16]       |

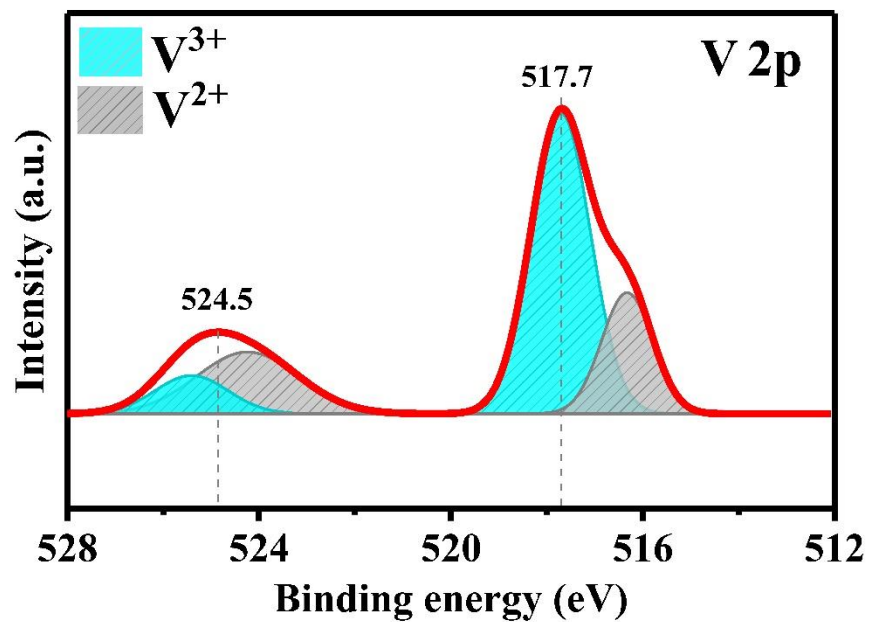

**Figure S19.** XPS spectrum of V 2p with 100 cycles for A/C-V<sub>2</sub>O<sub>3-x</sub>@C-HMCS electrode.

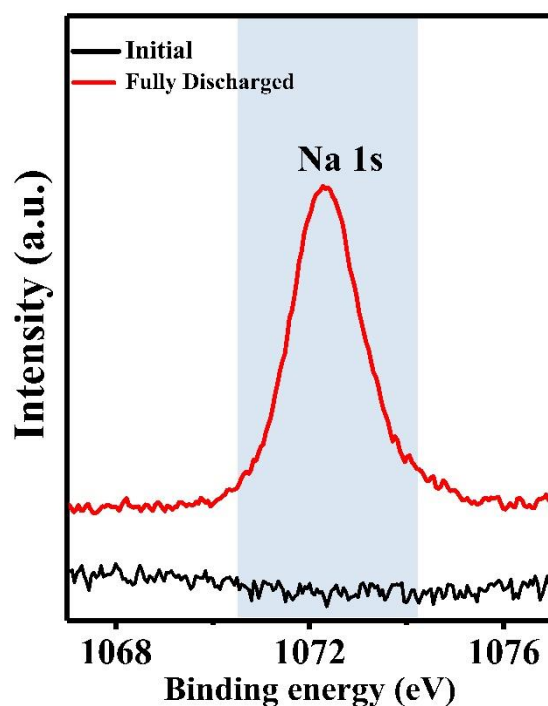

**Figure S20.** Ex-situ XPS Na 1st spectra of A/C-V<sub>2</sub>O<sub>3-x</sub>@C-HMCS electrodes at full discharge-stage (1.5 V).

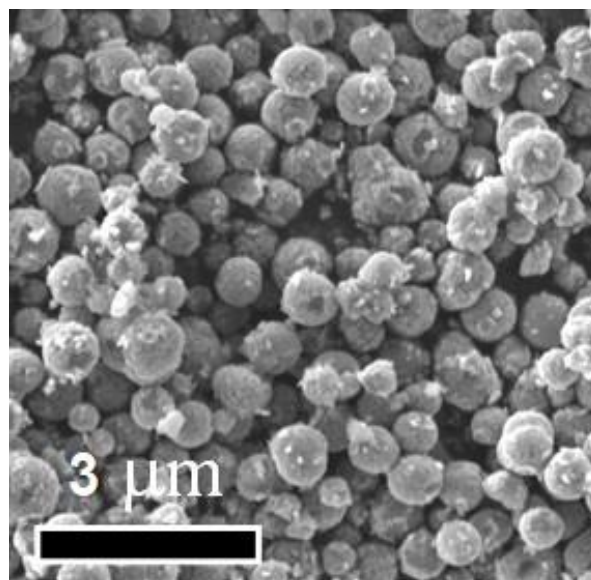

**Figure S21.** SEM images of A/C-V<sub>2</sub>O<sub>3-x</sub>@C-HMCS after 1000 cycles.

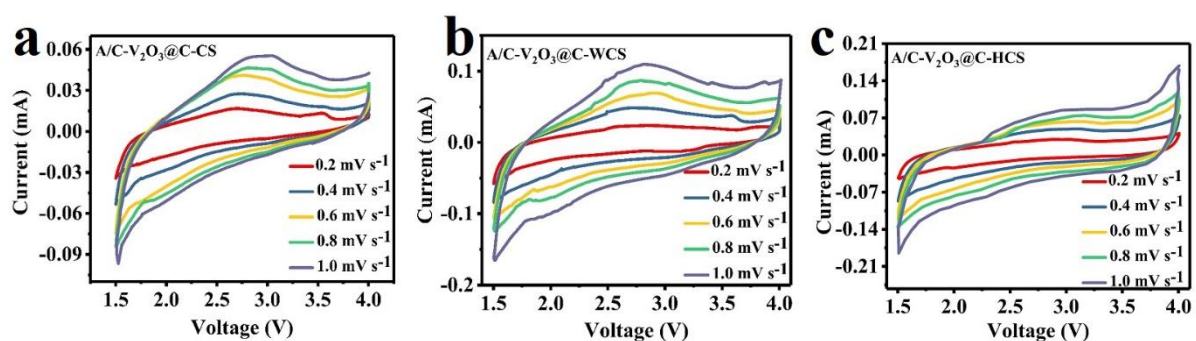

**Figure S22.** CV profiles at different scan rates (0.2-1.0 mV s<sup>-1</sup>) between 1.5-4.0 V (versus Na<sup>+</sup>/Na) of A/C-V<sub>2</sub>O<sub>3</sub>@C-CS, A/C-V<sub>2</sub>O<sub>3</sub>@C-WCS, and A/C-V<sub>2</sub>O<sub>3</sub>@C-HCS cathodes.



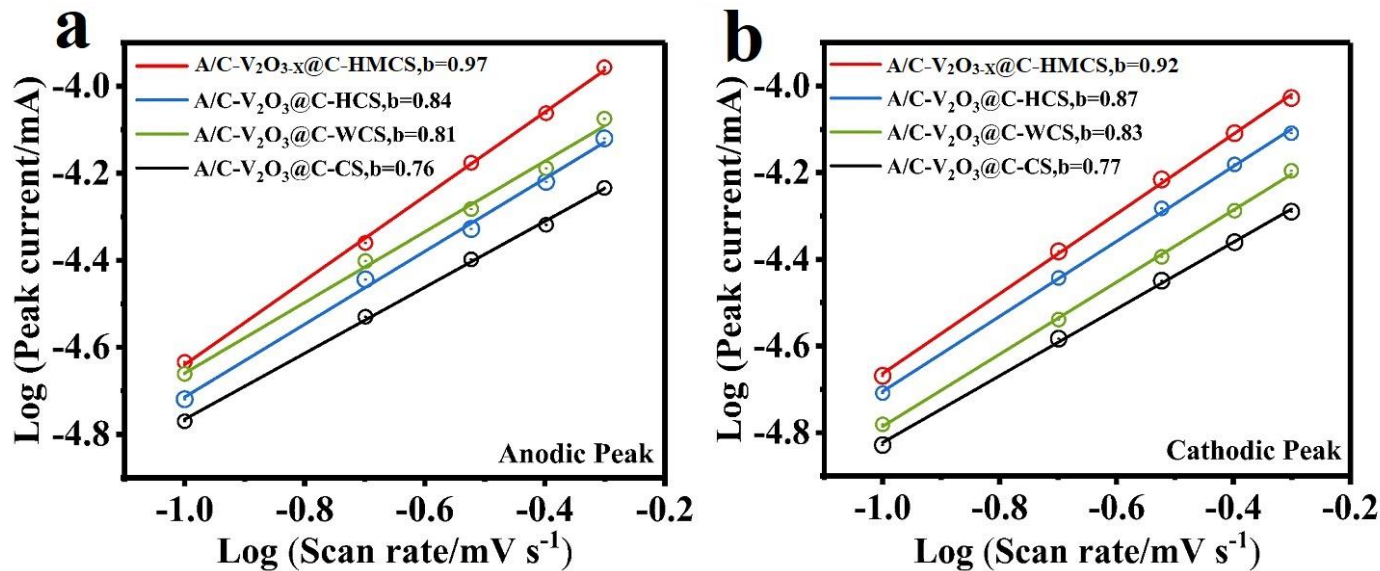

**Figure S23.** Calculated b-values from log (peak current) versus log (scan rate) plots for A/C- $V_2O_{3-x}$ @C-CS, A/C- $V_2O_3$ @C-WCS, A/C- $V_2O_3$ @C-HCS, and A/C- $V_2O_{3-x}$ @C-HMCS.

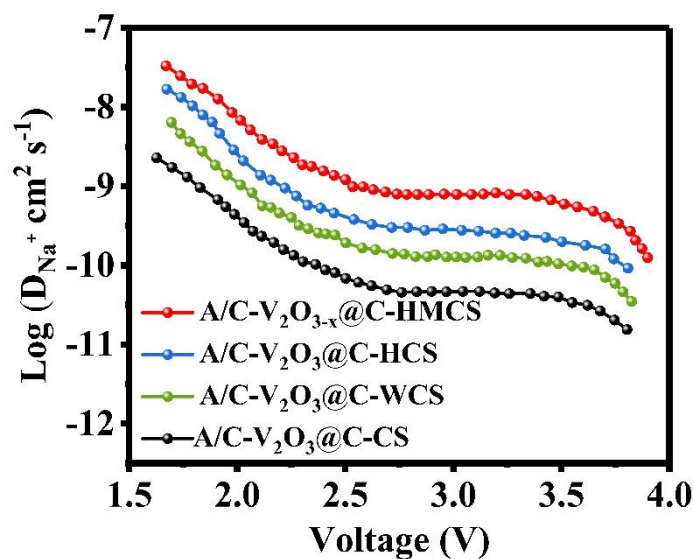

**Figure S24.** Diffusion coefficients calculated from the GITT during the desodiation process of A/C- $V_2O_3$ @C-CS, A/C- $V_2O_3$ @C-WCS, A/C- $V_2O_3$ @C-HCS, and A/C- $V_2O_{3-x}$ @C-HMCS.

## REFERENCES\*

- [1] S. Osman, S. Zuo, X. Xu, J. Shen, Z. Liu, F. Li, P. Li, X. Wang, J. Liu, *ACS Appl. Mater. Interfaces* **2021**, 13, 816.
- [2] S. Osman, C. Peng, J. Shen, F. Li, W. Huang, J. Liu, J. Liu, D. Xue, M. Zhu, *Nano Energy* **2022**, 107481.
- [3] S. Tepavcevic, H. Xiong, V. R. Stamenkovic, X. Zuo, M. Balasubramanian, V. B. Prakapenka, C. S. Johnson, T. Rajh, *ACS Nano* **2012**, 6, 530.
- [4] Y. Li, C. Liu, Z. Xie, J. Yao, G. Cao, *J. Mater. Chem. A* **2017**, 5, 16590.
- [5] H. Huang, T. Tian, L. Pan, X. Chen, E. Tervoort, C.-J. Shih, M. Niederberger, *J. Mater. Chem. A* **2019**, 7, 16109.
- [6] B. Yan, X. Li, Z. Bai, L. Lin, G. Chen, X. Song, D. Xiong, D. Li, X. Sun, *J. Mater. Chem. A* **2017**, 5, 4850.
- [7] Q. Pang, Y. Zhao, Y. Yu, X. Bian, X. Wang, Y. Wei, Y. Gao, G. Chen, *ChemSusChem* **2018**, 11, 735.
- [8] X. Song, J. Li, Z. Li, Q. Xiao, G. Lei, Z. Hu, Y. Ding, H. M. Kheimeh Sari, X. Li, *ACS Appl. Mater. Interfaces* **2019**, 11, 10631.
- [9] Y. Fang, Q. Liu, L. Xiao, Y. Rong, Y. Liu, Z. Chen, X. Ai, Y. Cao, H. Yang, J. Xie, C. Sun, X. Zhang, B. Aoun, X. Xing, X. Xiao, Y. Ren, *Chem* **2018**, 4, 1167.
- [10] Y. Cai, J. Zhou, G. Fang, G. Cai, A. Pan, S. Liang, *J. Power Sources* **2016**, 328, 241.
- [11] Y. Dong, S. Li, K. Zhao, C. Han, W. Chen, B. Wang, L. Wang, B. Xu, Q. Wei, L. Zhang, X. Xu, L. Mai, *Energy Environ. Sci.* **2015**, 8, 1267.
- [12] R. Gao, R. Tan, L. Han, Y. Zhao, Z. Wang, L. Yang, F. Pan, *J. Mater. Chem. A* **2017**, 5, 5273.
- [13] J.-Z. Guo, P.-F. Wang, X.-L. Wu, X.-H. Zhang, Q. Yan, H. Chen, J.-P. Zhang, Y.-G. Guo, *Adv. Mater.* **2017**, 29, 1701968.
- [14] J.-Z. Guo, A.-B. Yang, Z.-Y. Gu, X.-L. Wu, W.-L. Pang, Q.-L. Ning, W.-H. Li, J.-P. Zhang, Z.-M. Su, *ACS Appl. Mater. Interfaces* **2018**, 10, 17903.
- [15] Y. Cai, X. Cao, Z. Luo, G. Fang, F. Liu, J. Zhou, A. Pan, S. Liang, *Adv Sci (Weinh)* **2018**, 5, 1800680.
- [16] S. Li, X. Song, X. Kuai, W. Zhu, K. Tian, X. Li, M. Chen, S. Chou, J. Zhao, L. Gao, *J. Mater. Chem. A* **2019**, 7, 14656.
